# Supplementary material
Source: Springer Nature journal article supplement (https://www.springermedizin.de/resource/supplementary/13601_2013_646_MOESM8_ESM.pdf/9677908)
Supplement: MOESM8 [file 9677908]

**Table 2.** Summary baseline characteristics of the eligible study population.

| Baseline characteristics                                       |                    | Study population<br>n = 678 |            |
|----------------------------------------------------------------|--------------------|-----------------------------|------------|
| Sex: male n (%)                                                |                    | 313 (46.2)                  |            |
| Age: median (IQR)                                              |                    | 46 (26, 60)                 |            |
| BMI, median (IQR)                                              |                    | 26.0 (22.9, 30.6)           |            |
| Rhinitis diagnosis or therapy, n(%)                            |                    | 305 (45.0)                  |            |
| Smoking status, n(%)                                           | Current Smoker     | 40 (5.9)                    |            |
|                                                                | Ex-smoker          | 145 (21.4)                  |            |
|                                                                | Non-smoker         | 477 (70.4)                  |            |
| Exacerbations, n(%)                                            | 0                  | 551 (81.3)                  |            |
|                                                                | 1                  | 83 (12.2)                   |            |
|                                                                | ≥2                 | 44 (6.5)                    |            |
| SABA dose (mcg),<br>n(%)                                       | 1-100              | 121 (17.8)                  |            |
|                                                                | 101-200            | 132 (19.5)                  |            |
|                                                                | 201-400            | 94 (13.9)                   |            |
|                                                                | 401+               | 47 (6.9)                    |            |
| Average ICS Daily<br>dose, (mcg) BDP-<br>equivalent dose, n(%) | None               | 304 (44.8)                  |            |
|                                                                | 1-100              | 67 (9.9)                    |            |
|                                                                | 101-200            | 106 (15.6)                  |            |
|                                                                | 201-400            | 101 (14.9)                  |            |
|                                                                | 401+               | 100 (14.7)                  |            |
| Asthma therapy, n(%)                                           | None               | 197 (29.1)                  |            |
|                                                                | SABA               | 120 (17.7)                  |            |
|                                                                | ±SABA<br>±SAMA     | LTRA                        | 8 (1.2%)   |
|                                                                |                    | ICS                         | 163 (24.0) |
|                                                                |                    | ICS+LABA                    | 132 (19.5) |
|                                                                |                    | ICS+LAMA                    | 1 (0.1)    |
|                                                                |                    | ICS+LABA+LAMA               | 5 (0.7)    |
|                                                                |                    | ICS+LTRA                    | 8 (1.2)    |
|                                                                |                    | ICS+LABA+LTRA               | 41 (6.0)   |
|                                                                | ICS+LABA+LAMA+LTRA | 1 (0.1)                     |            |
| Other                                                          | 2 (0.3)            |                             |            |
